# Supplementary material
Source: PubMed Central journal article supplement (PMC3697098)
Supplement: NIHMS480618-supplement-01.pdf [file NIHMS480618-supplement-01.pdf]

## SUPPLEMENTARY INFORMATION

**Table S1.** Statistical analysis of GFP expression in cell line and primary macrophages *in vitro* and *ex vivo*

**Table S2.** Statistical analysis of GFP expression in non-macrophage cell lines *in vitro*.

**Table S3.** Statistical analysis of GFP expression in hematopoietic cells *in vivo*.
