# Supplementary material
Source: PubMed Central journal article supplement (PMC3697098)

# Supplementary figure 1

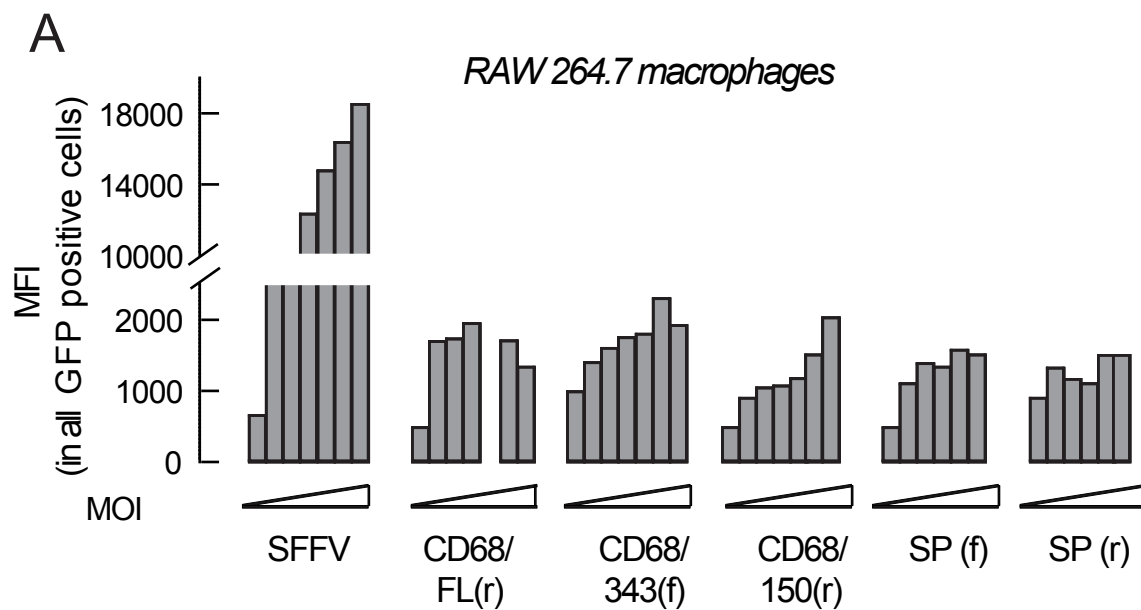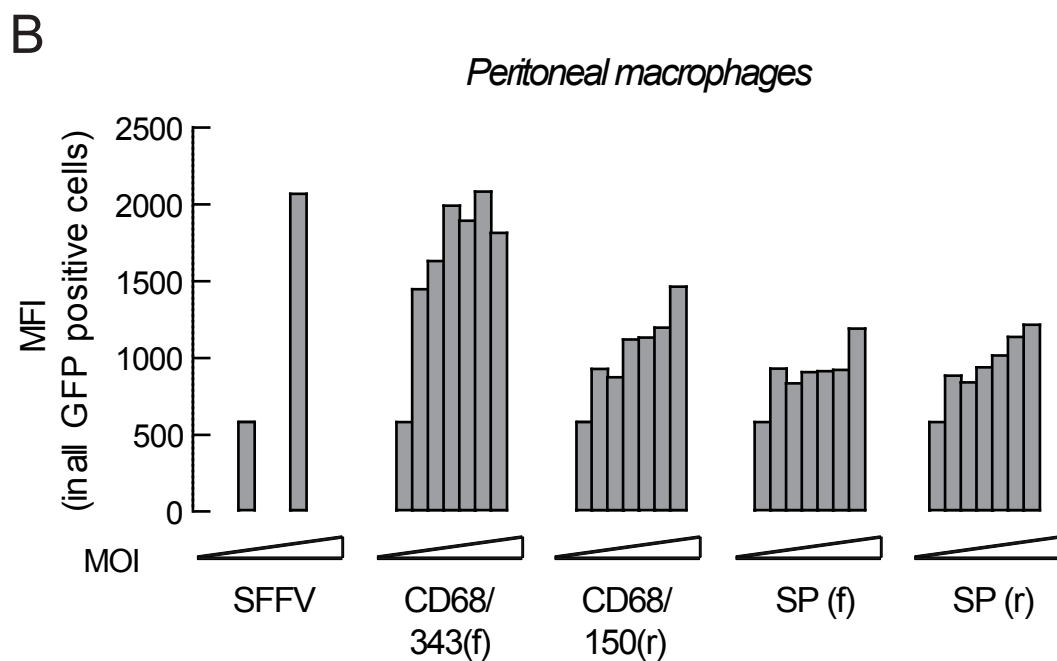

Supplement: NIHMS480618-supplement-Suppl_Data.pdf [file NIHMS480618-supplement-Suppl_Data.pdf]
